# Supplementary material for: Effect of the probiotic Weissella cibaria CMS1 on the immune response and the oral microbiome: a randomized, double-blind, placebo-controlled, parallel study
Source: Royal Society of Chemistry journal article supplement (doi:10.1039/d4fo00195h), 2024-01-01
Supplement: d4fo00195h1.pdf [file d4fo00195h1.pdf]

## Supplementary Table

Supplementary Table 1. Dietary intake<sup>1)</sup>

| Variables                     | Placebo        | <i>Weissella cibaria</i><br>CMS1 | <i>P</i> -value <sup>2)</sup> |        |            |
|-------------------------------|----------------|----------------------------------|-------------------------------|--------|------------|
|                               |                |                                  | Group                         | Week   | Group*Week |
| Energy (kcal/d)               |                |                                  |                               |        |            |
| Week 0                        | 1290.3 ± 62.1  | 1241.5 ± 62.1                    |                               |        |            |
| Week 6                        | 1383.7 ± 65.3  | 1506.3 ± 66.0                    |                               |        |            |
| Week 12                       | 1406.7 ± 65.3  | 1485.8 ± 66.0                    | 0.467                         | <0.001 | 0.210      |
| <i>P</i> -value <sup>3)</sup> | 0.103          | 0.001                            |                               |        |            |
| Carbohydrate (g/d)            |                |                                  |                               |        |            |
| Week 0                        | 194.2 ± 10.1   | 187.1 ± 10.1                     |                               |        |            |
| Week 6                        | 212.4 ± 10.6   | 222.2 ± 10.7                     |                               |        |            |
| Week 12                       | 224.2 ± 10.6   | 225.3 ± 10.7                     | 0.907                         | <0.001 | 0.626      |
| <i>P</i> -value <sup>3)</sup> | 0.016          | 0.002                            |                               |        |            |
| Protein (g/d)                 |                |                                  |                               |        |            |
| Week 0                        | 47.0 ± 3.0     | 46.8 ± 3.0                       |                               |        |            |
| Week 6                        | 52.9 ± 3.2     | 61.6 ± 3.2                       |                               |        |            |
| Week 12                       | 52.0 ± 3.2     | 56.4 ± 3.2                       | 0.178                         | 0.001  | 0.249      |
| <i>P</i> -value <sup>3)</sup> | 0.190          | 0.012                            |                               |        |            |
| Fat (g/d)                     |                |                                  |                               |        |            |
| Week 0                        | 36.1 ± 3.1     | 34.4 ± 3.1                       |                               |        |            |
| Week 6                        | 36.8 ± 3.2     | 41.2 ± 3.3                       |                               |        |            |
| Week 12                       | 36.3 ± 3.2     | 39.9 ± 3.3                       | 0.517                         | 0.357  | 0.475      |
| <i>P</i> -value <sup>3)</sup> | 0.963          | 0.159                            |                               |        |            |
| Sodium (mg/d)                 |                |                                  |                               |        |            |
| Week 0                        | 2644.9 ± 220.4 | 2856.6 ± 220.4                   |                               |        |            |
| Week 6                        | 3113.5 ± 232.0 | 3171.8 ± 234.6                   |                               |        |            |
| Week 12                       | 2928.4 ± 232.0 | 3056.4 ± 234.6                   | 0.588                         | 0.099  | 0.916      |
| <i>P</i> -value <sup>3)</sup> | 0.273          | 0.443                            |                               |        |            |

1) LSmean ± SE (all such values).

2) Linear mixed-effect model was used to analyze the effects of group, week, and group\*week.

3) Linear mixed-effect model was used to analyze the difference within each group.
